# Supplementary material
Source: Springer Nature journal article supplement (https://www.springermedizin.de/resource/supplementary/12995_2010_160_MOESM1_ESM.pdf/9622810)

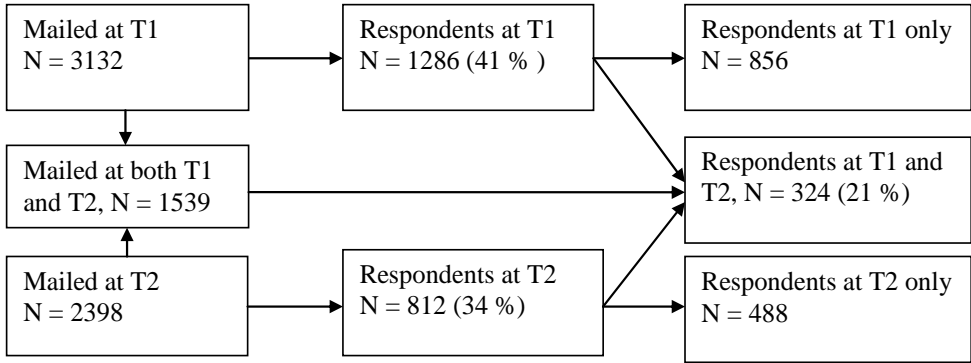

Supplement: MOESM1 [file 9622810]
